# Supplementary material for: Photoactive PtII and PdII complexes of N,N-diethyl-N′-3,4,5-trimethoxybenzoylthiourea: synthesis, crystal structures, DFT and cytotoxicity studies
Source: Royal Society of Chemistry journal article supplement (doi:10.1039/d1nj02320a), 2021-01-01
Supplement: d1nj02320a1.pdf [file d1nj02320a1.pdf]

# **Photoactive Pt<sup>II</sup> and Pd<sup>II</sup> complexes of *N,N*-diethyl-*N*'-3,4,5-trimethoxybenzoylthiourea: synthesis, crystal structures, DFT and cytotoxicity studies (Supplementary Material)**

H. A. Nkabyo<sup>a\*</sup>, O. R. Oyenih<sup>b</sup>, O. Olaoye<sup>c</sup>, P. Sikiti<sup>a</sup>, G.W. Bosman<sup>c</sup>, R. C. Luckay<sup>a\*</sup>

## **Table of Contents**

|                       | <b>Page</b> |
|-----------------------|-------------|
| <b>Figure S1.....</b> | <b>S2</b>   |
| <b>Figure S2.....</b> | <b>S3</b>   |
| <b>Figure S3.....</b> | <b>S4</b>   |
| <b>Figure S4.....</b> | <b>S5</b>   |
| <b>Figure S5.....</b> | <b>S6</b>   |
| <b>Figure S6.....</b> | <b>S7</b>   |
| <b>Figure S7.....</b> | <b>S8</b>   |
| <b>Figure S8.....</b> | <b>S9</b>   |

## **Figure S1**

---

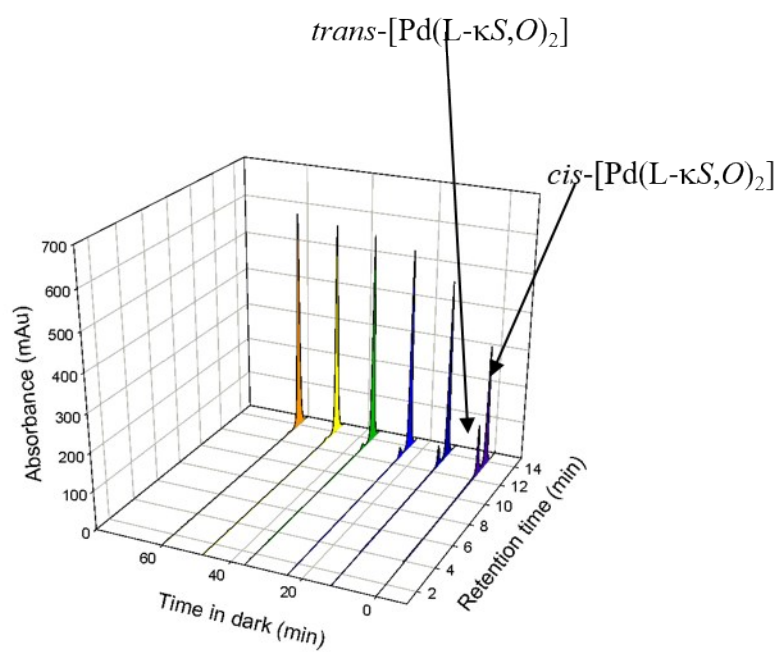

**Fig. S1.** Overlaid RP-HPLC chromatograms of *cis*-[Pd(L-κS,O)<sub>2</sub>] in acetonitrile after irradiation for 15 min with a 5 Watt LED lamp, and subsequently left in the dark.

**Figure S2**

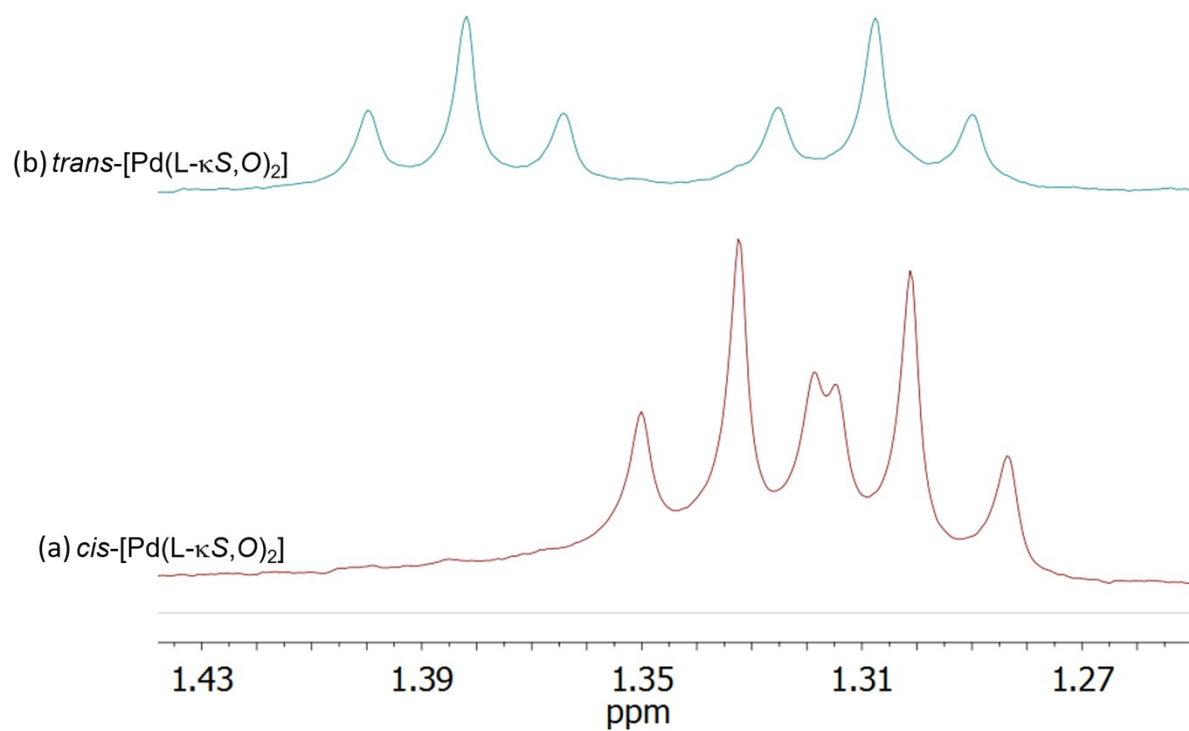

**Fig. S2.** Upfield region of the <sup>1</sup>H NMR spectra of (a) *cis*-[Pd(L-κS,O)<sub>2</sub>] and (b) *trans*-[Pd(L-κS,O)<sub>2</sub>] in chloroform-*d* at 25 °C.

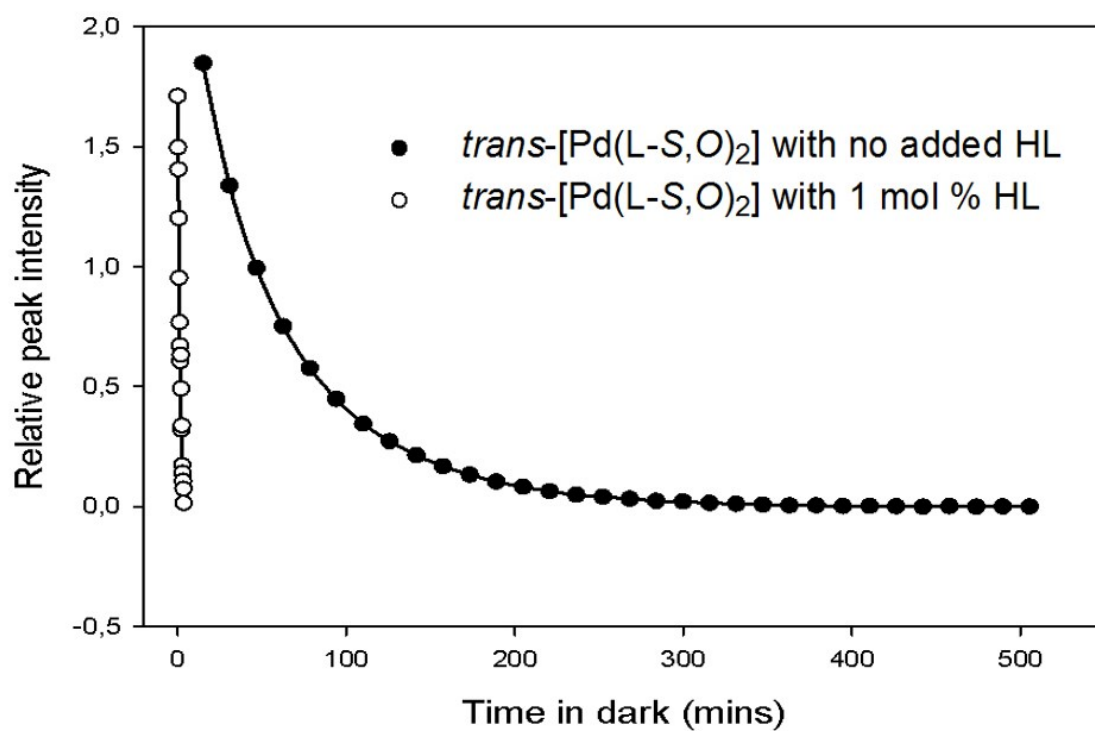

**Fig. S3.** Comparison of plots of relative peak intensity for spontaneous *trans*→*cis* isomerization for isolated *trans*-[Pd(L-κS,O)<sub>2</sub>] in chloroform-*d* before and after the addition of 1 mol % HL.

**Figure S4**

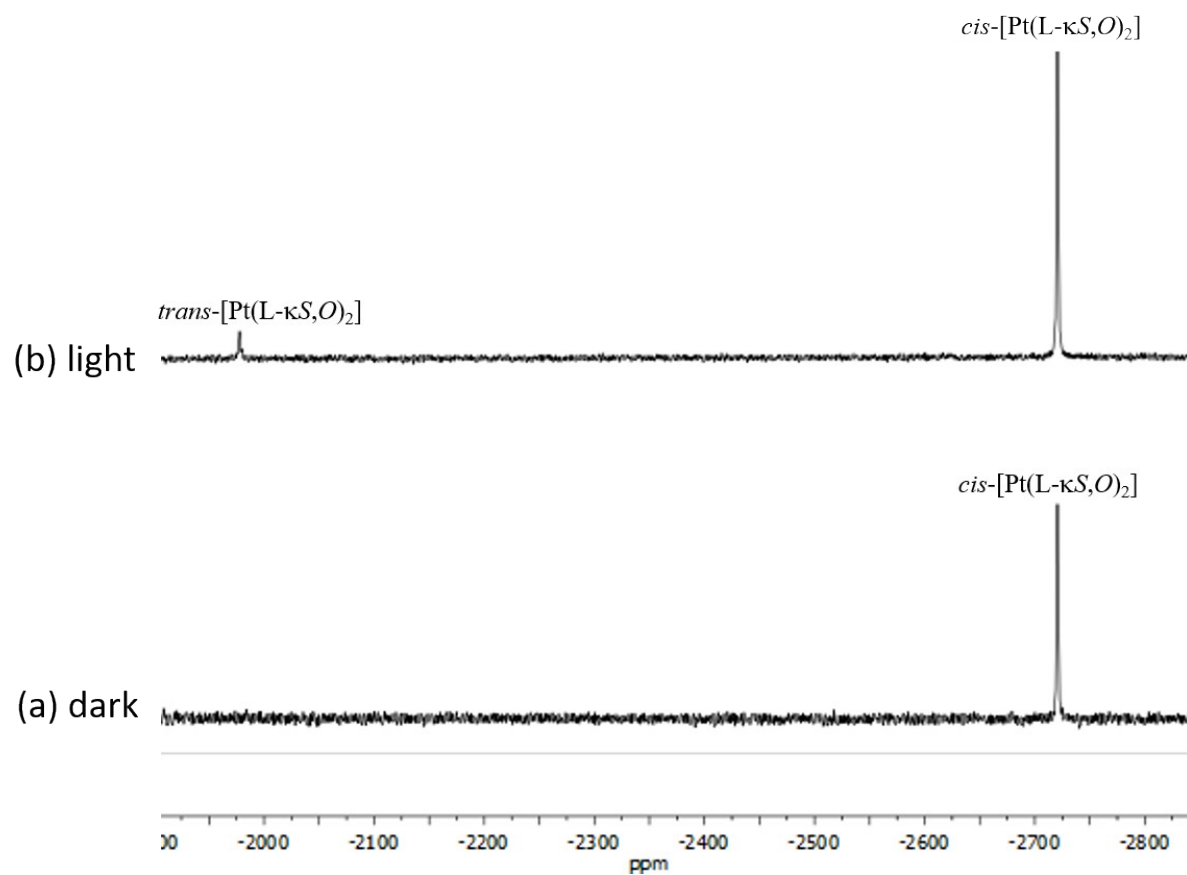

**Fig. S4.**  $^{195}\text{Pt}$  NMR of  $\textit{cis}$ -[Pt(L- $\kappa$ S, $O$ ) $_2$ ] (a) before and (b) after in  $\text{CDCl}_3$  irradiation for 30 min with a 5 Watt LED lamp.<sup>21</sup>

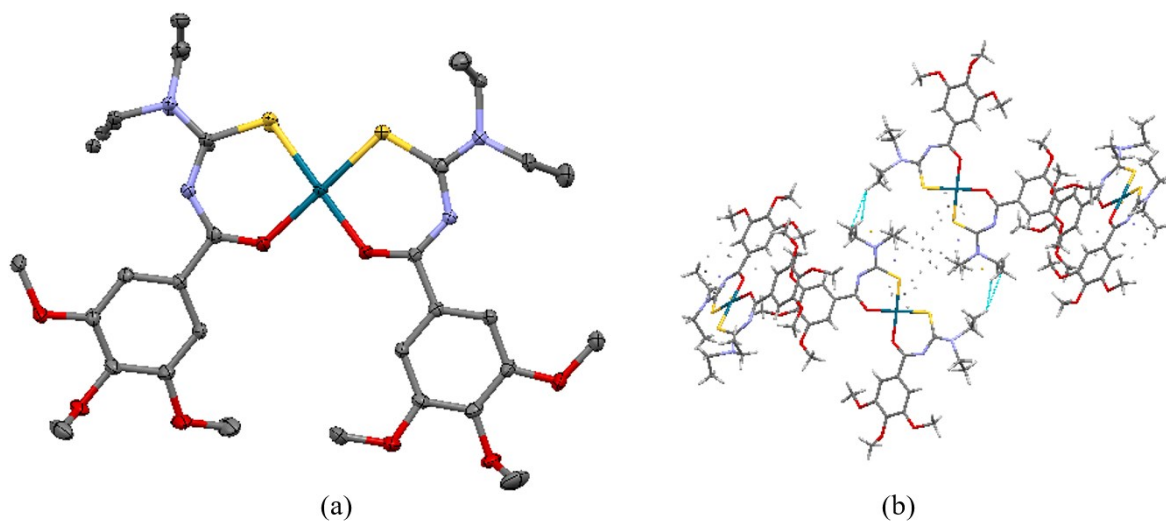

**Fig. S5.** Molecular structures from single-crystal X-ray diffraction of (a)  $cis-[Pd(L-\kappa S,O)_2]^{21}$  and (b) its crystal packing.

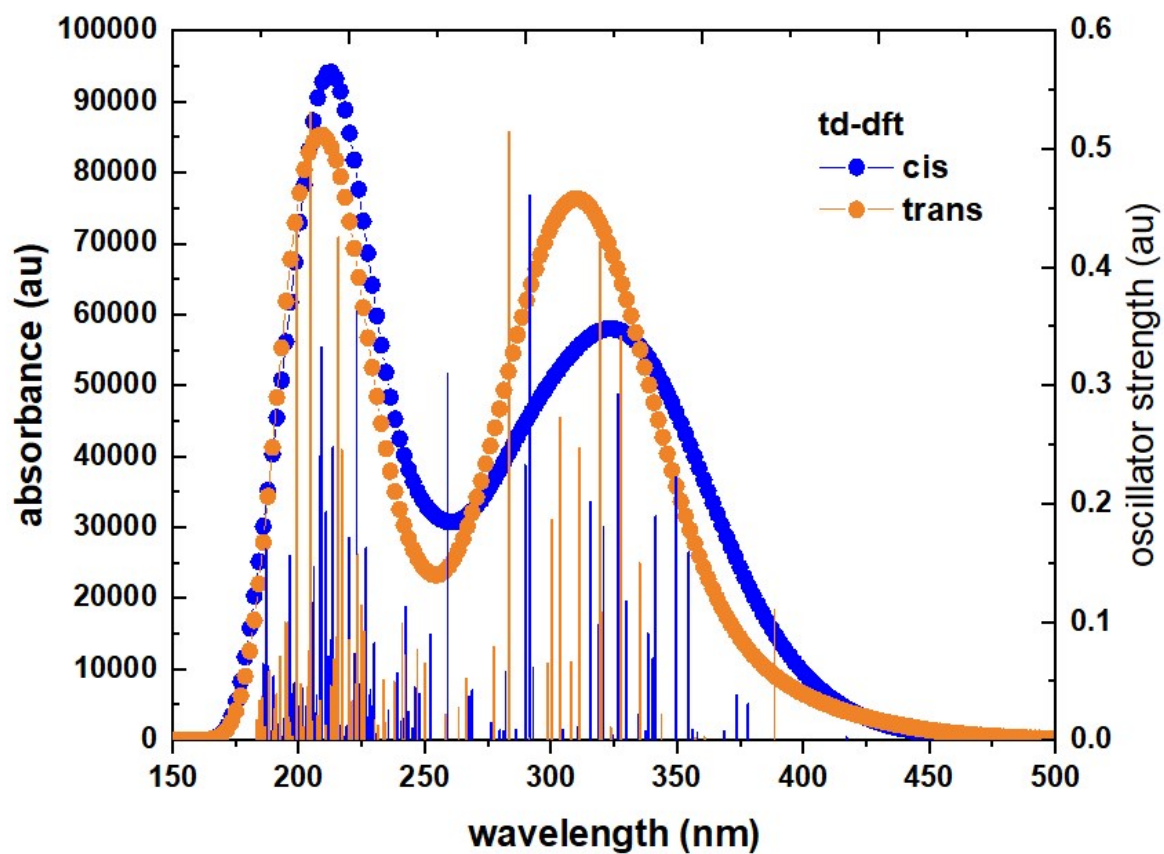

**Fig. S6.** TD-DFT calculated absorption spectra of *cis*-[Pd(L-κS,O)<sub>2</sub>] and *trans*-[Pd(L-κS,O)<sub>2</sub>], overlapped with corresponding oscillator strengths. The calculation was done with B3LYP/CEP-31G level of theory.

**Figure S7**

(a) *cis*

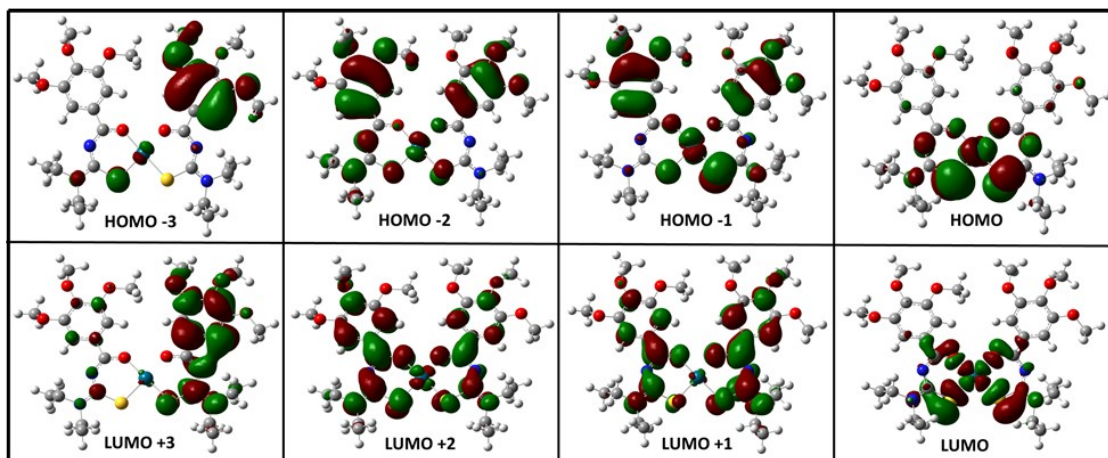

(b) *trans*

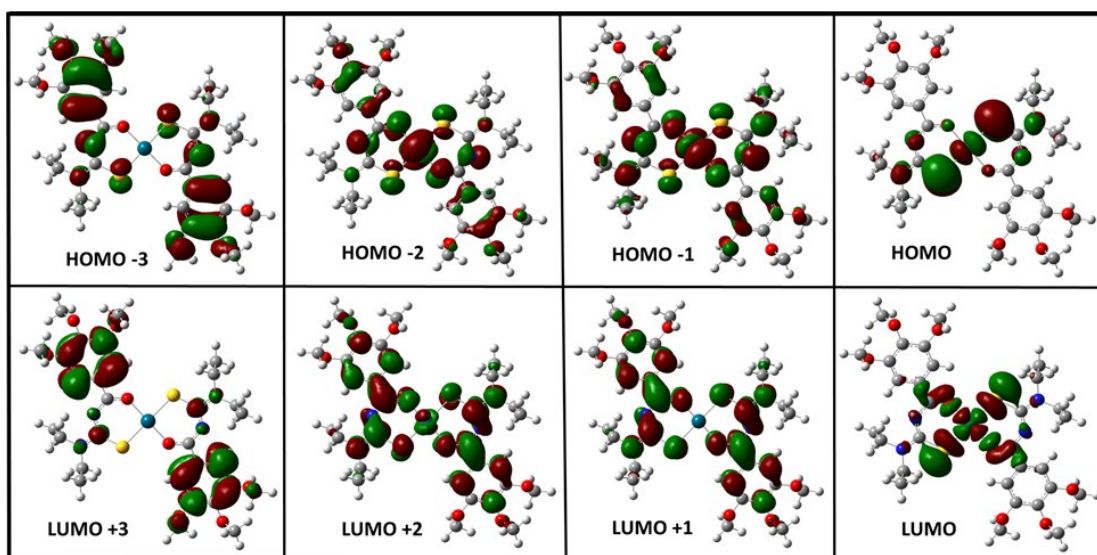

Fig. S7. HOMO and LUMO orbitals of (a) *cis*-[Pd(L- $\kappa$ S,O)<sub>2</sub>] and (b) *trans*-[Pd(L- $\kappa$ S,O)<sub>2</sub>].

**Figure S8**



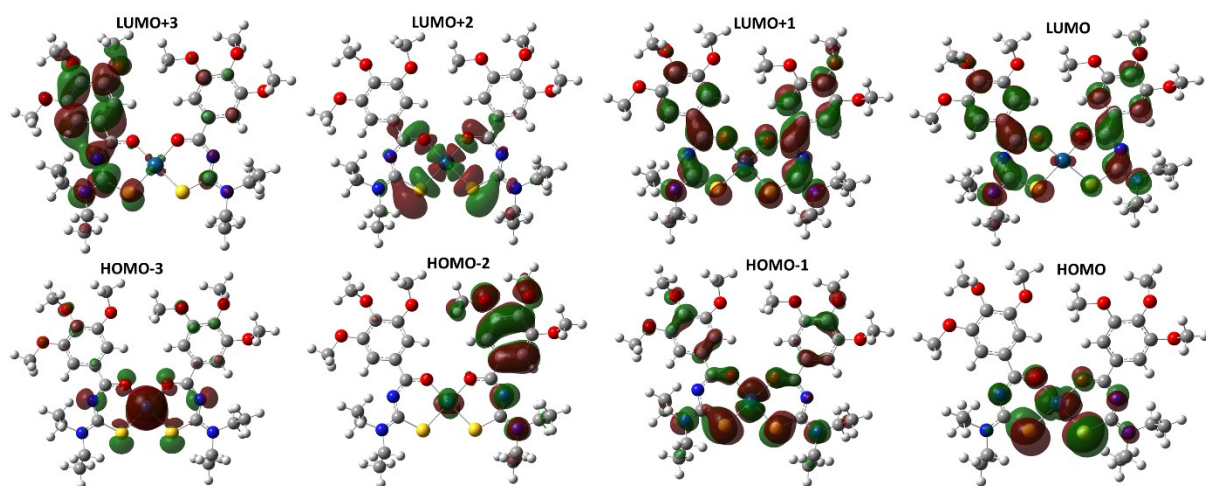

Fig. S8. HOMO and LUMO orbitals of *cis*-[Pt(L-κS,O)<sub>2</sub>]
